# Supplementary material
Source: PubMed Central journal article supplement (PMC6626544)
Supplement: NIHMS1031943-supplement-Supplemental_Information.pdf [file NIHMS1031943-supplement-Supplemental_Information.pdf]

## Supplementary Materials for

### **Cediranib suppresses homology-directed DNA repair through down-regulation of BRCA1/2 and RAD51**

Alanna R. Kaplan, Susan E. Gueble, Yanfeng Liu, Sebastian Oeck, Hoon Kim, Zhong Yun, Peter M. Glazer\*

\*Corresponding author. Email: [peter.glazer@yale.edu](mailto:peter.glazer@yale.edu)

Published 15 May 2019, *Sci. Transl. Med.* **11**, eaav4508 (2019)

DOI: 10.1126/scitranslmed.aav4508

#### **The PDF file includes:**

##### Materials and Methods

Fig. S1. Cediranib suppresses expression of HDR factors in cancer cells in culture.

Fig. S2. Effects of cediranib on HDR factor expression are not mediated through a trans-acting factor.

Fig. S3. Inhibition of VEGFRs does not suppress HDR factor expression.

Fig. S4. Inhibition of PDGFRs suppresses HDR factor expression.

Fig. S5. siRNA-mediated targeting of *PDGFR* $\beta$  suppresses HDR factor expression.

Fig. S6. No consistent changes were observed in cell cycle profiles after various kinase inhibitor and siRNA treatments.

Fig. S7. Cediranib suppresses expression of FANCD2 in cancer cells in culture.

Fig. S8. PDGFR inhibition shifts migration of p130.

Table S1. Reported mutations in DNA repair genes.

#### **Other Supplementary Material for this manuscript includes the following:**

(available at [stm.sciencemag.org/cgi/content/full/11/492/eaav4508/DC1](http://stm.sciencemag.org/cgi/content/full/11/492/eaav4508/DC1))

Data file S1 (Microsoft Excel format). Individual data points.

## Supplementary Materials:

### Materials and Methods

*Cell culture:* SKOV3, MCF7, and MDA-MB-231 cells were obtained from ATCC. IGROV1 and PEO14 cells were provided by Dr. Elena Ratner (Yale University School of Medicine). PEO1 and PEO4 cells were obtained from Dr. Toshiyasu Taniguchi (Fred Hutchinson Cancer Research Center). MDA231-5XHRE-GFP cells were provided by Dr. Zhong Yun (Yale University School of Medicine). RKO-Neo and RKO-E7 cells were provided by Dr. Kathleen Cho (University of Michigan). U2OS EJ-DR and MCF7 DR-GFP cells were provided by Dr. Ranjit Bindra (Yale University School of Medicine). Cells were grown in McCoy's (SKOV3), RPMI (IGROV1, MDA-MB-231, MDA231-5XHRE-GFP, PEO1, PEO4, and PEO14), or DMEM (MCF7, U2OS EJDR and MCF7 DR-GFP) medium containing 10% fetal bovine serum without antibiotics. RKO-Neo and -E7 cells were grown in MEM medium containing 10% fetal bovine serum and 500 µg/ml G418.

*Conditioned medium:* SKOV3 cells were seeded at a density of  $2 \times 10^5$  cells per 10 cm dish, then treated with DMSO or cediranib for 2 hours followed by several PBS washes and replacement of medium. 24 hours later, conditioned medium from DMSO- and cediranib-treated cells was collected and centrifuged for 5 minutes at 4300 rpm. New SKOV3 cells seeded at a density of  $1 \times 10^6$  cells per 10 cm dish were treated with conditioned medium for 24 hours, then collected and processed for Western blot analysis as described above.

*DNA repair luciferase reporter plasmids:* To assess HDR, we used a modified gWIZ.Luciferase vector (Gelantis) containing an inactivating I-SceI recognition site in the Firefly luciferase gene with a downstream promoter-less copy of the gene that can serve as a donor template for HDR. A double strand break was introduced into this plasmid via restriction enzyme digest using I-SceI (New England Biosystems). To assess NHEJ, we used the Firefly luciferase plasmid pGL3 (Promega) and introduced a double strand break between the promoter and the luciferase gene via HindIII restriction enzyme digestion (New England Biosystems). Unmodified gWiz.Luciferase and undigested pGL3 plasmids were used as normalization controls for HDR and NHEJ, respectively. Cells were pretreated with cediranib for 6 hours before transfection of 1 µg/ml luciferase plasmids using Turbofect (ThermoFisher). 50 ng/ml of a Renilla luciferase plasmid (pCMV-RL, Promega) was transfected simultaneously as an internal transfection control. Cells were collected 24 hours after transfection, and luciferase activity was quantified using Dual Luciferase Reporter Assay (Promega). Percent reactivation was calculated by dividing Firefly luciferase activity by Renilla luciferase activity and normalizing to the control samples.

*Plasmid-mediated overexpression:* Plasmids containing the open reading frames for the human *PDGFRβ* and *VEGFR2* genes with C-terminal FLAG (DYKDDDDK) tags under control of the CMV promoter were obtained from GenScript (*PDGFRβ*: OHu25829, *VEGFR2*: OHu27183). SKOV3 cells were transfected with 1 µg/ml plasmids using Turbofect (ThermoFisher), and 48 hours later were treated for Western blot or cell viability analysis as described above.

*Cell cycle analysis:* SKOV3 cells were seeded at a density of 100,000 cells per well in a 96-well plate then treated with inhibitors for 24 hours or siRNAs for 96 hours. Cells were then fixed in

70% EtOH for 4 hours and stained with Hoescht33342 at a concentration of 1 µg/mL overnight, and washed three times with PBS. Nuclear DNA content was then analyzed on the basis of dye intensity using automated digital microscopy with a BioTek Cytation 3 Cell Imaging Multi-Mode Reader (ThermoFisher).

*Kinase inhibitor screen:* The kinase inhibitor screen was performed in U2OS EJ-DR cells using compounds from a commercially available kinase inhibitor library (SelleckChem) at a concentration of 10 µmol/L. DSBs were induced by the addition of triamcinolone (0.5 µM, Sigma) and Shield1 (100 nM, Clontech) to cell culture medium for 24 hours to activate the endogenously expressed I-Sce I enzyme. Cells were analyzed by flow cytometry to quantify GFP<sup>+</sup> cells 72 hours after DSB induction. Ouabain was used as a positive control (37). In parallel, compound toxicity was determined using CellTiterGlo (Promega), and any compounds inducing more than 50% cytotoxicity were excluded from further analysis. Data are presented as % vehicle-treated control.

*RAD51 foci:* Cells were seeded in 8-chamber slides and irradiated at the next day with 2 Gy using an X-RAD 320 X-Ray Biological Irradiator (Precision X-Ray Inc). Non-irradiated controls were handled in parallel but kept outside of the irradiator during treatment. After the desired repair times, cells were fixed and permeabilized in 3% PFA/0.5% Triton-X100/2% sucrose for 20 minutes. Blocking was performed with 5% fetal bovine serum and 5% normal goat serum in PBS overnight at 4 C. Subsequently, samples were incubated with primary antibodies (anti-γ-H2A.X antibody mouse, 1:400, 05-636, EMD Millipore, and anti-RAD51 rabbit, 1:300, PC130, CalBiochem) in blocking solution overnight at 4 C. After washing with 0.5% Triton-X100 in PBS, samples were incubated with secondary antibodies [anti-mouse AF Plus 488, anti-rabbit AF Plus 555 (1:400; A32732, Thermo Fisher)] in blocking solution for 90 min at room temperature (RT). DNA was stained with DAPI (2.5 µg/mL; #1816957; Thermo Fisher) for 15 min at RT. After washes, chambers were removed from the slides and the slides were covered with coverslips using DAKO Fluorescence Mounting Medium (S3023; Dako NA Inc.) and sealed with nail polish. Images were analysed with a Nikon Eclipse Ti fluorescence microscope with a Plan Apo 60X/1.40 Oil DIC h objective, a CSU-W1 confocal scanning unit with an iXon Ultra camera (Andor Technology), MLC 400B laser unit (Agilent Technologies), and NIS Elements 4.30 software (Nikon Corporation). Foci were analysed with the Focinator v2-30 software as previously described (39). Representative images were generated with ImageJ.

*Antibodies:* The following antibodies were used for Western blotting: BRCA2 (Calbiochem, OP95), BRCA1 (Santa Cruz, sc-6954), RAD51 (Novus, NB100-148), DNA-PKcs (CST, #4602), Ku80 (BD, #611360), XLF (CST, #2854), vinculin (Abcam, ab129002), GAPDH (Santa Cruz, sc-365062), FLAG (Sigma, F7425), VEGFR2 (CST, #3479), caspase-3 (CST, #9664), cleaved PARP (CST, #9541), pPP2A(Y307) (ThermoFisher, PA5-36874), and PP2A (CST, #2259).

*Quantitative real-time PCR analysis:* The following premixed primers and probes were used: *BRCA2*, *BRCA1*, *RAD51*, *PRKDC*, *XRCC5*, *XRCC4*, *NHEJ1*, *PDGFRα*, *PDGFRβ*, *ACTB*, and *18S* (Applied Biosystems).

*Chromatin immunoprecipitation (ChIP) primers:*

Quantitative analysis was performed with RT-PCR using the following primers:

*BRCA1-F:* 5'-GATTGGGACCTCTTCTTACG-3'

*BRCA1*-R: 5'-TACCCAGAGCAGAGGGTGAA-3'

*BRCA2*-F: 5'-AAGCGTGAGGGGACAGATT-3'

*BRCA2*-R: 5'-GCCGGAGTAAGCTGACAAA-3'

*RAD51*-F: 5'-CCCCCGGCATAAAGTTTGAAT-3'

*RAD51*-R: 5'-GAAGCGCCGCACTCTCCTTA-3'

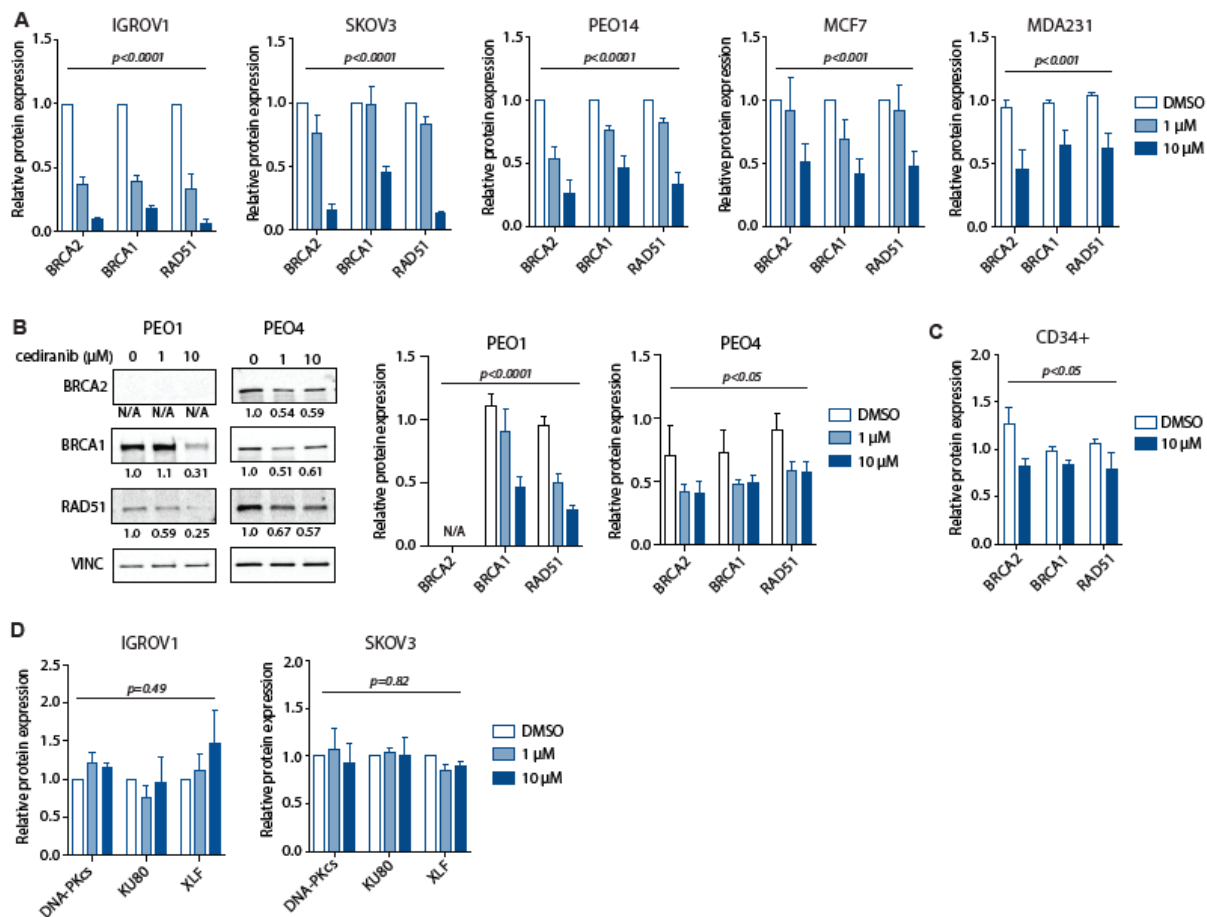

**Fig. S1. Cediranib suppresses expression of HDR factors in cancer cells in culture.**

(A) Quantification of Western blots of HDR factors in ovarian (IGROV1, SKOV3, and PEO14) and breast (MCF7 and MDA231) cancer cell lines treated with increasing doses of cediranib in culture (2-way ANOVA, effect of cediranib IGROV1  $p < 0.0001$ , SKOV3  $p < 0.0001$ , PEO14  $p < 0.0001$ , MCF7  $p < 0.001$ , MDA231  $p < 0.001$ ,  $n = 3$  independent experiments). (B) Western blot of HDR factors in PEO1 (BRCA2-deficient) and PEO4 (BRCA2-proficient) ovarian cancer cell lines treated with increasing doses of cediranib in culture (2-way ANOVA, effect of cediranib PEO1  $p < 0.0001$ , PEO4  $p < 0.05$ ,  $n = 3$  independent experiments). (C) Quantification of Western blots of HDR factors in primary human CD34+ hematopoietic stem/progenitor cells treated with cediranib in culture compared to control (2-way ANOVA, effect of cediranib  $p < 0.05$ ,  $n = 3$  technical replicates). (D) Quantification of Western blots of NHEJ factors in ovarian cancer cell lines treated with increasing doses of cediranib in culture (2-way ANOVA, effect of cediranib IGROV1  $p = 0.49$ , SKOV3  $p = 0.82$ ,  $n = 3$  independent experiments). Data are represented as means  $\pm$  SEM. Numbers below Western blot panels represent relative quantification of the respective bands normalized to loading control by densitometry.

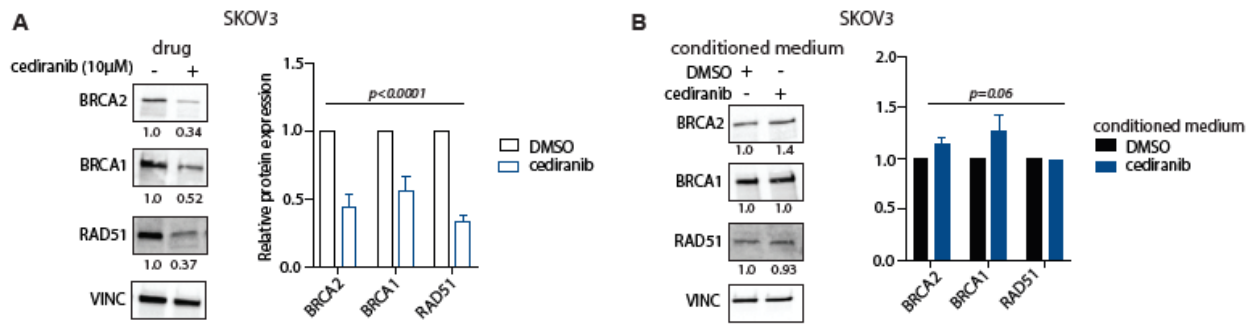

**Fig. S2. Effects of cediranib on HDR factor expression are not mediated through a trans-acting factor.**

Western blot of HDR factors in SKOV3 cells treated with DMSO or cediranib (A) or conditioned medium from DMSO-treated or from cediranib-treated cells (B) in culture (2-way ANOVA, effect of cediranib  $p < 0.0001$ , effect of conditioned medium  $p = 0.06$ ,  $n = 3$  technical replicates). Data are represented as means  $\pm$  SEM. Numbers below Western blot panels represent relative quantification of the respective bands normalized to loading control by densitometry.

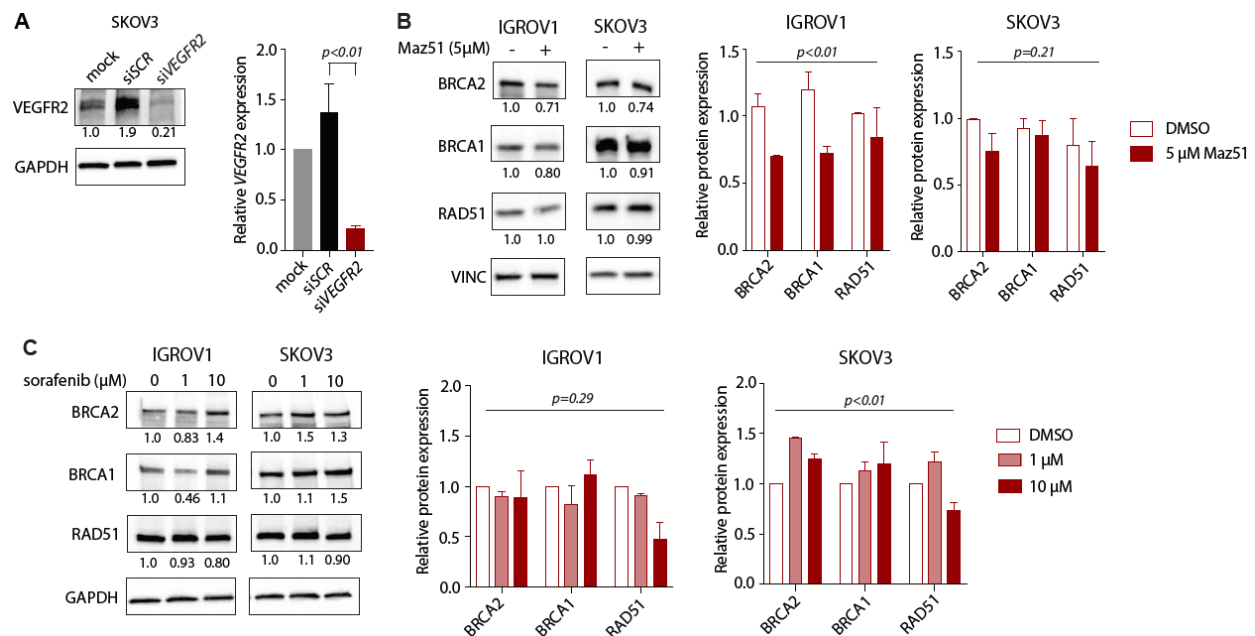

**Fig. S3. Inhibition of VEGFRs does not suppress HDR factor expression.**

(A) Western blot of VEGFR2 in SKOV3 cells 72 hours after treatment with *VEGFR2* siRNA (1-way ANOVA,  $p < 0.01$ , siSCR vs. si*VEGFR2*  $p < 0.01$ ,  $n = 3$  independent experiments). (B) Western blot of HDR factors in IGROV1 and SKOV3 cells treated with the VEGFR3 inhibitor, Maz51, in culture (2-way ANOVA, effect of Maz51: IGROV1  $p < 0.01$ , SKOV3  $p = 0.21$ ,  $n = 3$  biological replicates). (C) Western blot of HDR factors in IGROV1 and SKOV3 cells treated with the VEGFR inhibitor, sorafenib, in culture (2-way ANOVA, effect of sorafenib: IGROV1  $p = 0.29$ , SKOV3  $p < 0.01$ ,  $n = 3$  biological replicates). Data are represented as means  $\pm$  SEM. Numbers below Western blot panels represent relative quantification of the respective bands normalized to loading control by densitometry.

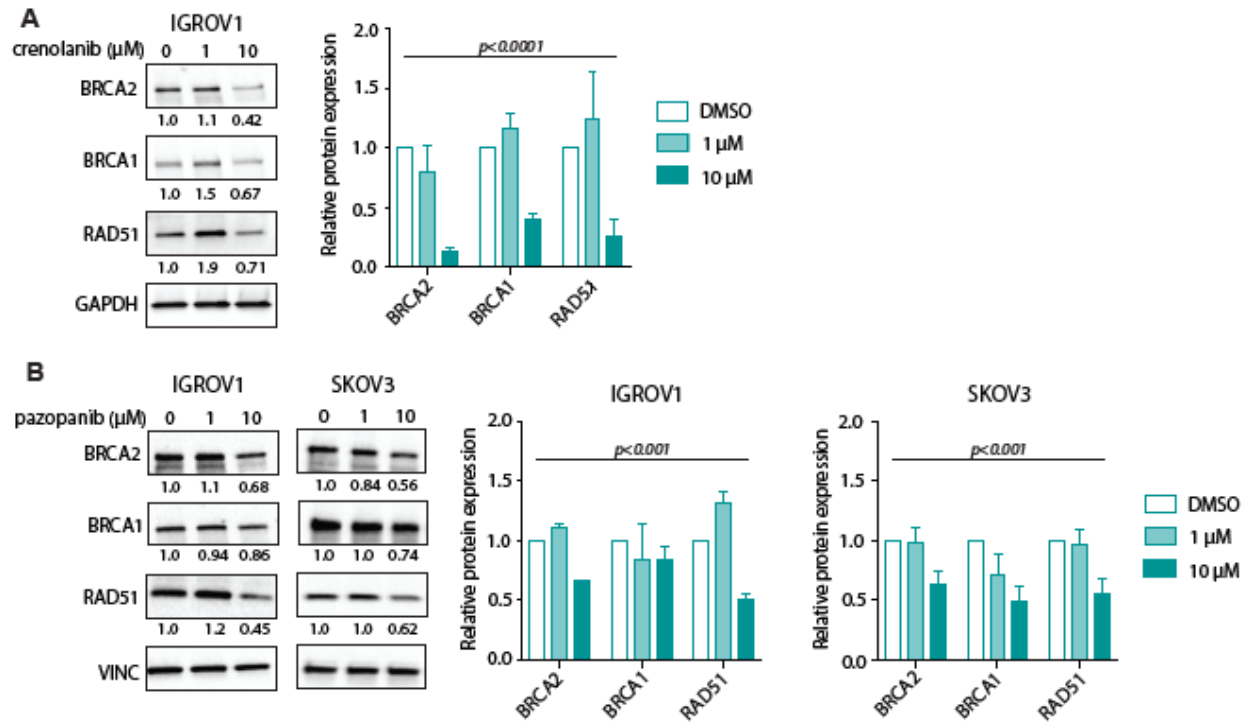

**Fig. S4. Inhibition of PDGFRs suppresses HDR factor expression.**

(A) Western blot of HDR factors in IGROV1 cells treated with increasing doses of the PDGFR inhibitor, crenolanib (2-way ANOVA, effect of crenolanib  $p < 0.0001$ ,  $n = 3$  independent experiments). (B) Western blot of HDR factors in IGROV1 and SKOV3 cells treated with increasing doses of the PDGFR inhibitor, pazopanib (2-way ANOVA, effect of pazopanib: IGROV1  $p < 0.001$ , SKOV3  $p < 0.001$ ,  $n = 3$  independent experiments). Data are represented as means  $\pm$  SEM. Numbers below Western blot panels represent relative quantification of the respective bands normalized to loading control by densitometry.



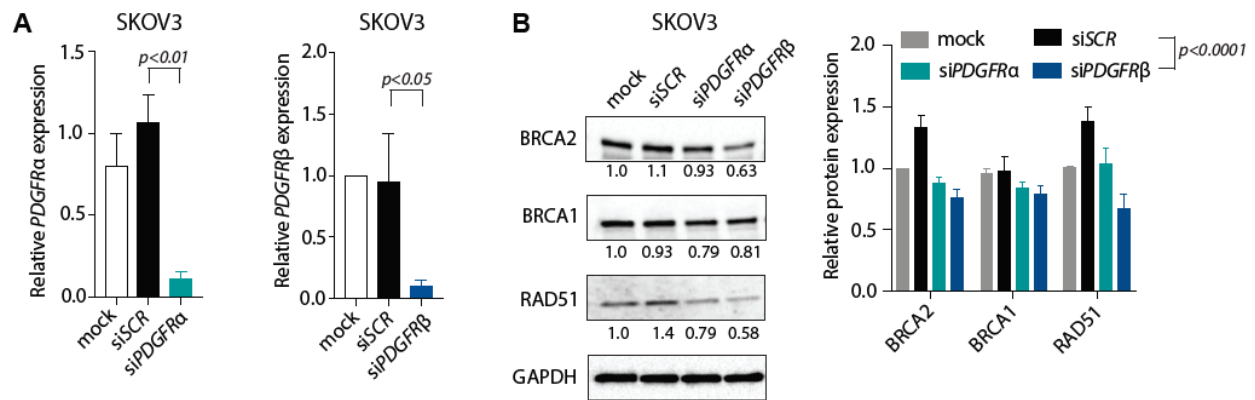

**Fig. S5. siRNA-mediated targeting of *PDGFRβ* suppresses HDR factor expression.**

(A) Relative gene expression of *PDGFRα* and *PDGFRβ* assayed by qRT-PCR in SKOV3 cells 72 hours after treatment with *PDGFRα* and *PDGFRβ* siRNAs (1-way ANOVA, *PDGFRα*  $p < 0.05$ ; siSCR vs. si*PDGFRα*  $p < 0.01$ ; *PDGFRβ*:  $p = 0.05$ ; siSCR vs. si*PDGFRβ*  $p < 0.05$ ,  $n = 3$  biological replicates). (B) Western blot of HDR factors in SKOV3 cells after siRNA-mediated knockdown of *PDGFRα* and *PDGFRβ* (2-way ANOVA, effect of siRNA  $p < 0.0001$ , siSCR vs. si*PDGFRβ*  $p < 0.0001$ , mock, siSCR, si*PDGFRβ*  $n = 8$  technical replicates, si*PDGFRα*  $n = 5$  technical replicates). Data are represented as means  $\pm$  SEM. Numbers below Western blot panels represent relative quantification of the respective bands normalized to loading control by densitometry.

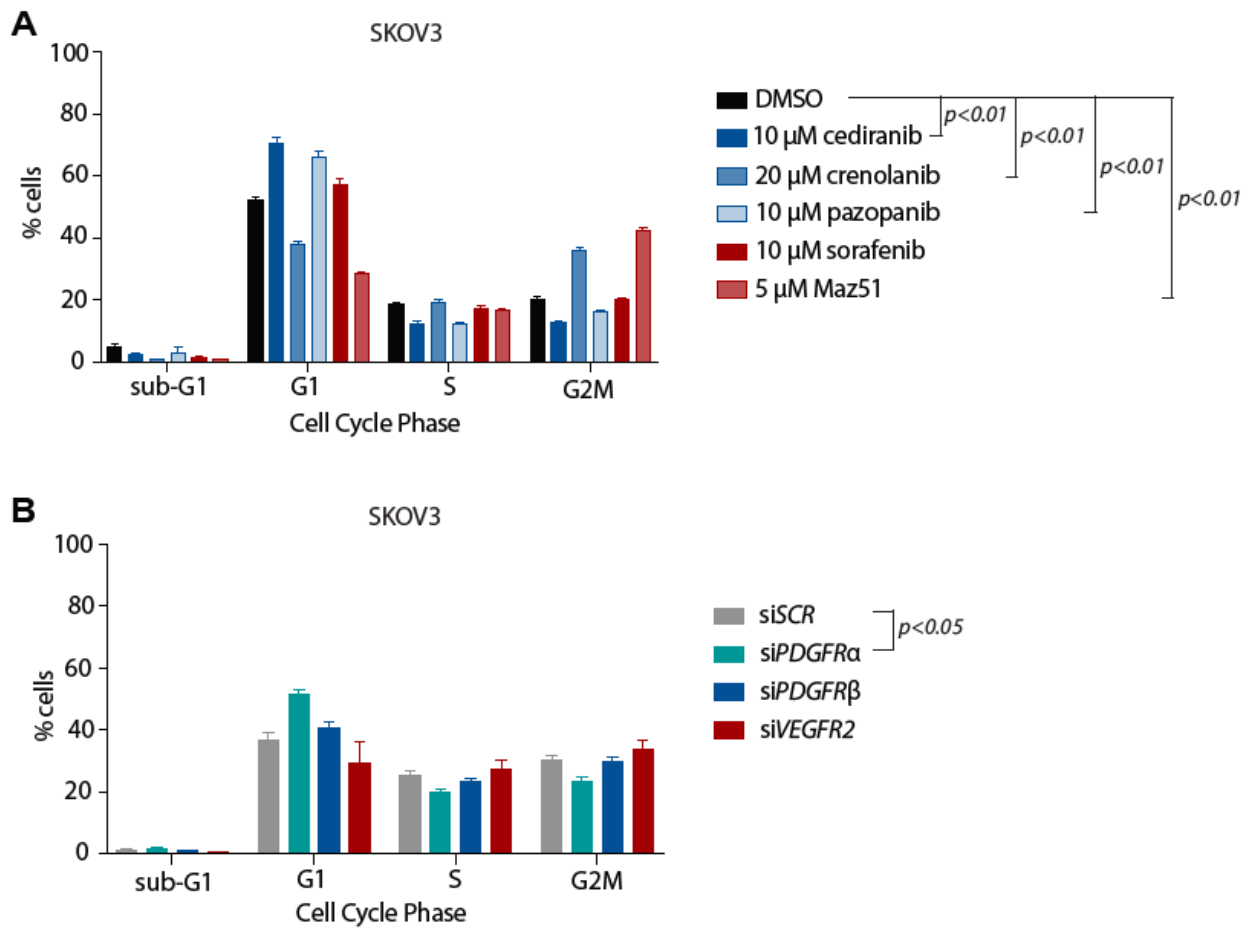

**Fig. S6. No consistent changes were observed in cell cycle profiles after various kinase inhibitor and siRNA treatments.**

(A) Cell cycle profiles in SKOV3 cells 24 hours after treatment with small molecule kinase inhibitors (2-way ANOVA, interaction  $p < 0.001$ , DMSO vs. 10  $\mu$ M cediranib  $p < 0.01$ , DMSO vs. 20  $\mu$ M crenolanib  $p = 0.01$ , DMSO vs. 10  $\mu$ M pazopanib  $p < 0.01$ , DMSO vs. 10  $\mu$ M sorafenib  $p = 0.99$ , DMSO vs. 5  $\mu$ M Maz51  $p = 0.001$ ;  $n = 5-6$  technical replicates). (B) Cell cycle profiles in SKOV3 cells 72 hours after treatment with siRNAs targeting *PDGFR $\alpha$* , *PDGFR $\beta$* , and *VEGFR2* (2-way ANOVA, interaction  $p < 0.001$ , siSCR vs. siPDGFR $\alpha$   $p < 0.05$ , siSCR vs. siPDGFR $\beta$   $p = 0.18$ , siSCR vs. siVEGFR2  $p = 0.15$ ;  $n = 5-6$  technical replicates). Data are represented as means  $\pm$  SEM.

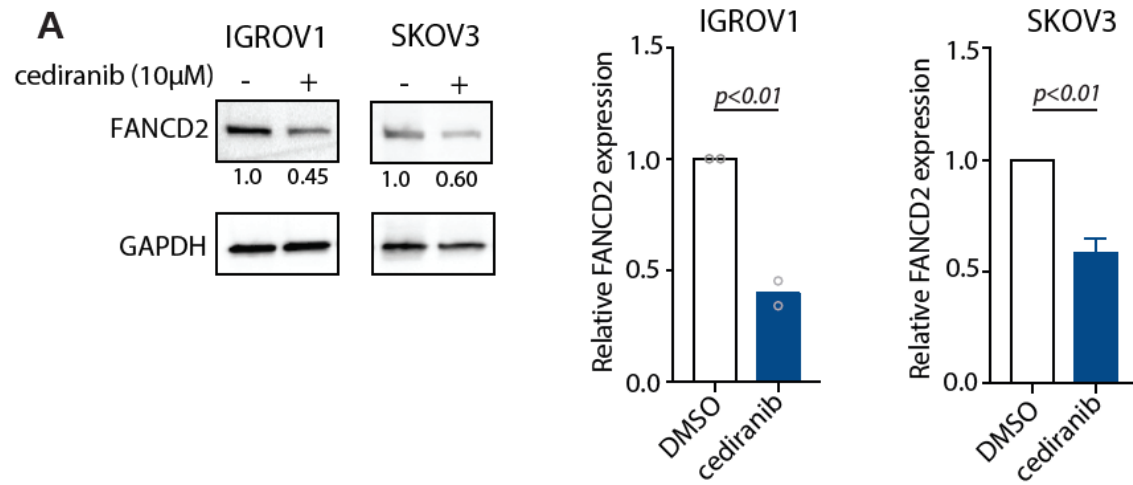

**Fig. S7. Cediranib suppresses expression of FANCD2 in cancer cells in culture.**

Western blot of FANCD2 expression in IGROV1 and SKOV3 cells treated with 10  $\mu$ M cediranib in culture (unpaired t-test, IGROV1  $p < 0.01$ , SKOV3  $p < 0.01$ ,  $n = 2-3$  technical replicates). Data are represented as means  $\pm$  SEM. Numbers below Western blot panels represent relative quantification of the respective bands normalized to loading control by densitometry.

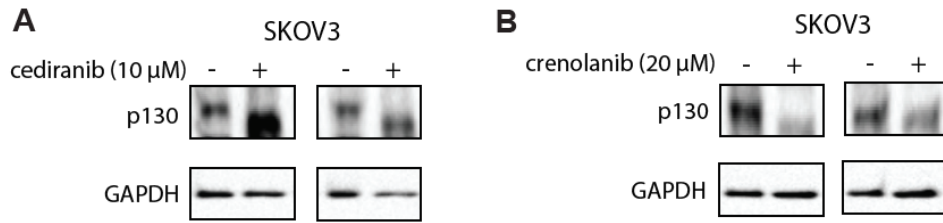

**Fig. S8. PDGFR inhibition shifts migration of p130.**

(A) Western blot of p130 in SKOV3 cells showing differential migration of p130 in SKOV3 cells after treatment with cediranib compared to controls (n=3 technical replicates). (B) Western blot of p130 in SKOV3 cells showing differential migration of p130 in SKOV3 cells after treatment with cediranib compared to controls (n=3 technical replicates).

**Table S1. Reported mutations in DNA repair genes.**

**Cell Line Encyclopedia**

| Gene                       | IGROV1     | SKOV3        | MCF7 | MDAMB231 | U2OS | RKO              |
|----------------------------|------------|--------------|------|----------|------|------------------|
| DNA Damage Recognition     |            |              |      |          |      |                  |
| <i>ATM</i>                 | R248Q      | X1413_splice |      |          |      |                  |
| <i>ATR</i>                 |            |              |      |          |      |                  |
| <i>CHEK1</i>               | T226Hfs*14 |              |      |          |      |                  |
| <i>CHEK2</i>               |            |              |      |          |      |                  |
| Homology Directed Repair   |            |              |      |          |      |                  |
| <i>RBBP8</i>               | K357Nfs*3  |              |      |          |      |                  |
| <i>MRE11</i>               | R525K      |              |      |          |      |                  |
| <i>RAD50</i>               | K583Rfs*14 |              |      |          |      | K583Rfs*14       |
| <i>NBN</i>                 |            |              |      |          |      |                  |
| <i>BRCA1</i>               | K654Sfs*47 |              |      |          |      | D435Y            |
| <i>BRCA2</i>               | P3150T     |              |      |          |      | N1784Tfs*7       |
| <i>RAD51</i>               |            |              |      |          |      |                  |
| <i>RPA1</i>                |            |              |      |          |      |                  |
| <i>EXO1</i>                |            |              |      |          |      |                  |
| <i>PALB2</i>               | T787I      |              |      |          |      |                  |
| <i>BARD1</i>               |            |              |      |          |      |                  |
| <i>RAD51B</i>              |            |              |      |          |      | S241P            |
| <i>RAD51C</i>              |            |              |      |          |      |                  |
| <i>RAD51D</i>              |            |              |      |          |      |                  |
| <i>XRCC3</i>               |            |              |      |          |      |                  |
| Non-Homologous End Joining |            |              |      |          |      |                  |
| <i>PRKDC</i>               | I166Yfs*6  |              |      |          |      | I166Yfs*6 L2891R |
| <i>XRCC6</i>               |            |              |      |          |      |                  |
| <i>XRCC5</i>               |            |              |      |          |      |                  |
| <i>XRCC4</i>               |            |              |      |          |      |                  |
| <i>LIG4</i>                |            |              |      |          |      |                  |
| <i>NHEJ1</i>               |            |              |      |          |      |                  |
| <i>DCLRE1C</i>             |            |              |      |          |      |                  |
| <i>POLL</i>                |            |              |      |          |      |                  |
| <i>POLM</i>                |            |              |      |          |      |                  |
| Fanconi Anemia Pathway     |            |              |      |          |      |                  |
| <i>FANCA</i>               |            |              |      |          |      | E345Vfs*63       |
| <i>FANCB</i>               |            |              |      |          |      |                  |
| <i>FANCC</i>               |            |              |      |          |      |                  |
| <i>FANCD2</i>              |            |              |      |          |      |                  |
| <i>FANCE</i>               |            |              |      |          |      | S389P            |
| <i>FANCF</i>               |            |              |      |          |      |                  |
| <i>FANCG</i>               |            |              |      |          |      |                  |
| <i>FANCI</i>               |            |              |      |          |      | M807V            |
| <i>BRIP1</i>               |            |              |      |          |      |                  |
| <i>FANCL</i>               |            |              |      |          |      |                  |
| <i>SLX4</i>                |            |              |      |          |      |                  |
| <i>ERCC4</i>               |            |              |      |          |      |                  |

|                |  |  |  |  |  |  |
|----------------|--|--|--|--|--|--|
| <i>UBE2T</i>   |  |  |  |  |  |  |
| <i>FAAP100</i> |  |  |  |  |  |  |
| <i>FAAP20</i>  |  |  |  |  |  |  |
| <i>FAAP24</i>  |  |  |  |  |  |  |
| <i>MUS81</i>   |  |  |  |  |  |  |
| <i>SLX1A</i>   |  |  |  |  |  |  |
| <i>XRCC2</i>   |  |  |  |  |  |  |

**NCI-60**

| Gene                       | IGROV1 | SKOV3      | MCF7  | MDAMB231 |
|----------------------------|--------|------------|-------|----------|
| DNA Damage Recognition     |        |            |       |          |
| <i>ATM</i>                 | R248Q  |            |       |          |
| <i>ATR</i>                 |        |            |       |          |
| <i>CHEK1</i>               |        |            |       |          |
| <i>CHEK2</i>               |        |            |       |          |
| Homology Directed Repair   |        |            |       |          |
| <i>RBBP8</i>               |        |            |       |          |
| <i>MRE11</i>               | R525K  |            |       |          |
| <i>RAD50</i>               |        |            |       |          |
| <i>NBN</i>                 |        |            |       |          |
| <i>BRCA1</i>               |        |            |       |          |
| <i>BRCA2</i>               |        |            |       |          |
| <i>RAD51</i>               |        | X75_splice |       |          |
| <i>RPA1</i>                |        |            |       |          |
| <i>EXO1</i>                |        |            |       |          |
| <i>PALB2</i>               |        |            |       |          |
| <i>BARD1</i>               |        |            |       |          |
| <i>RAD51B</i>              |        |            |       |          |
| <i>RAD51C</i>              |        |            |       |          |
| <i>RAD51D</i>              |        |            |       |          |
| <i>XRCC3</i>               |        |            |       |          |
| Non-Homologous End Joining |        |            |       |          |
| <i>PRKDC</i>               |        |            |       |          |
| <i>XRCC6</i>               |        |            |       |          |
| <i>XRCC5</i>               |        |            |       |          |
| <i>XRCC4</i>               |        |            | K197R |          |
| <i>LIG4</i>                |        |            |       |          |
| <i>NHEJ1</i>               |        |            |       |          |
| <i>DCLRE1C</i>             |        |            |       |          |
| <i>POLL</i>                |        |            |       |          |
| <i>POLM</i>                |        |            |       |          |
| Fanconi Anemia Pathway     |        |            |       |          |
| <i>FANCA</i>               |        |            |       |          |
| <i>FANCB</i>               |        |            |       |          |
| <i>FANCC</i>               |        |            |       |          |
| <i>FANCD2</i>              |        |            |       |          |
| <i>FANCE</i>               |        |            |       |          |
| <i>FANCF</i>               |        |            |       |          |

|                |  |  |                   |  |
|----------------|--|--|-------------------|--|
| <i>FANCG</i>   |  |  |                   |  |
| <i>FANCI</i>   |  |  |                   |  |
| <i>BRIP1</i>   |  |  |                   |  |
| <i>FANCL</i>   |  |  |                   |  |
| <i>SLX4</i>    |  |  |                   |  |
| <i>ERCC4</i>   |  |  |                   |  |
| <i>UBE2T</i>   |  |  |                   |  |
| <i>FAAP100</i> |  |  | L343P L348P C349S |  |
| <i>FAAP20</i>  |  |  |                   |  |
| <i>FAAP24</i>  |  |  |                   |  |
| <i>MUS81</i>   |  |  |                   |  |
| <i>SLX1A</i>   |  |  |                   |  |
| <i>XRCC2</i>   |  |  |                   |  |
